# Supplementary material for: Proton-coupled electron transfer in the electrocatalysis of CO2 reduction: prediction of sequential vs. concerted pathways using DFT
Source: Royal Society of Chemistry journal article supplement (doi:10.1039/c6sc02984a), 2016-08-22
Supplement: c6sc02984a1.pdf [file c6sc02984a1.pdf]

## Supporting information for

### Proton-coupled Electron Transfer in the Electrocatalysis of CO<sub>2</sub> Reduction: Prediction of Sequential vs Concerted Pathways using DFT

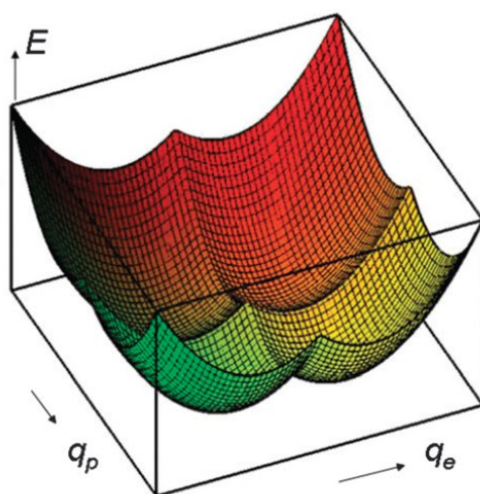

**Figure S1.** (reproduced from ref: Koper, M. T. M. *Phys. Chem. Chem. Phys.* **2013**, *15* (5), 1399) Topology of the potential energy surface (PES) along the PT and ET reaction coordinates ( $q_p$  and  $q_e$ ) predicted by the theory with no solvent overlap ( $q_e$  and  $q_p$  orthogonal,  $\lambda = 0$ ) and at the condition  $\text{pH} = \text{p}K_a(\text{AH})$  and  $E_{\text{applied}} = E_{\text{CPET}} = E_{\text{ET}}$ . The solvent overlap quantifies the coupling between the solvent modes along the PT and ET reaction coordinates. The SPET is kinetically favoured over CPET because the activation energy of the CPET ( $(\lambda_e + \lambda_p)/4$ , cf ref above) is always larger than for the individual steps ET ( $\lambda_e/4$ ) and PT ( $\lambda_p/4$ ).

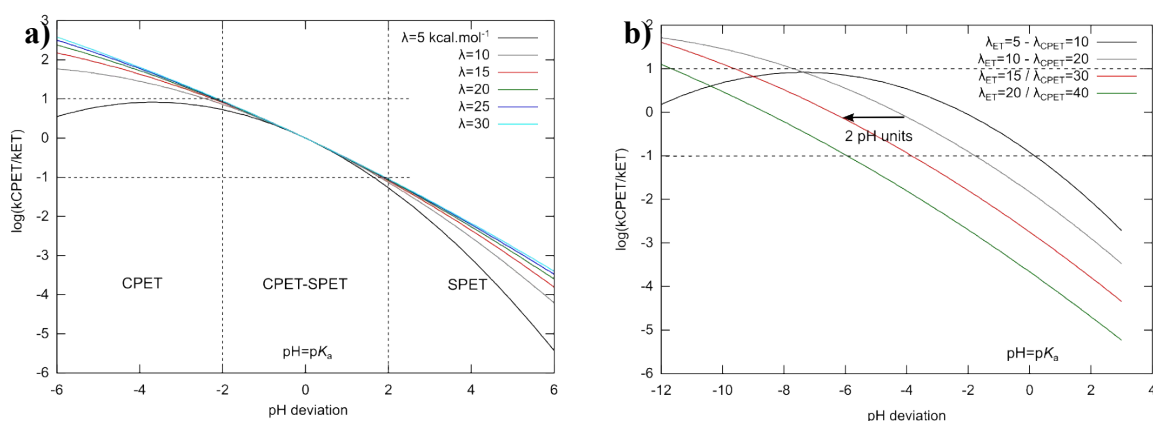

**Figure S2.** Quantitative analysis of the pH dependence of the competition between CPET and ET (SPET) steps. The analytical expressions corresponding to outersphere charge transfer are considered for the rate constant of the CPET and ET steps (*cf* eq. 1 and 3 in the manuscript) and the same preexponential factors are assumed for ET and CPET steps ( $k_{\text{ET}}^{\circ} = k_{\text{CPET}}^{\circ}$ ). Different set of values for  $\lambda_{\text{CPET}}$  and  $\lambda_{\text{ET}}$  are studied. **a)**  $\lambda_{\text{ET}} = \lambda_{\text{CPET}}$  corresponds to large favourable overlap between the reaction coordinates of ET and PT which leads to substantial negative values for the cross-reorganization energy  $\lambda$  (*cf* eq. 4 in manuscript). The region where both CPET and SPET pathways significantly take place (CPET-SPET) is defined for  $\log(k_{\text{CPET}}/k_{\text{ET}}) = \pm 1$ . For all  $\lambda$  values, this region is centred on the specific pH value  $\text{pH} = \text{p}K_a$ , for which  $k_{\text{CPET}} = k_{\text{ET}}$  ( $\log(k_{\text{CPET}}/k_{\text{ET}}) = 0$ ), and it approximately spans the pH range  $[\text{p}K_a - 2; \text{p}K_a + 2]$ . In the CPET-SPET region, the pH dependence is symmetric on both side of  $\text{pH} = \text{p}K_a$ . It is worth noting that for small  $\lambda$  values ( $\lambda = 5 \text{ kcal.mol}^{-1}$  on the plot), the inverted Marcus region may hindered the CPET pathway at relatively low pH. **b)**  $2 * \lambda_{\text{ET}} = \lambda_{\text{CPET}}$  is chosen to investigate the effect of the decrease of the overlap between ET and PT reaction coordinates ( $\lambda$  relatively small and negative or even positive if unfavourable overlap). The CPET-SPET region is substantially shifted to lower pH as the energy difference between  $\lambda_{\text{CPET}}$  and  $\lambda_{\text{ET}}$  increases ( $\log(k_{\text{CPET}}/k_{\text{ET}}) = 0$  is shifted by  $\Delta\text{pH} \approx -2$  for  $\Delta\lambda = +5 \text{ kcal.mol}^{-1}$ ). Furthermore, the pH range of this region tends to increase with  $\Delta\lambda$ . The trend observed for  $2 * \lambda_{\text{ET}} = \lambda_{\text{CPET}}$  are similar for  $\lambda_{\text{ET}} = \text{cte}$  and  $\lambda_{\text{CPET}} = \lambda_{\text{ET}} + \Delta\lambda$  with  $\Delta\lambda = 5, 10, 15, 20$  etc.

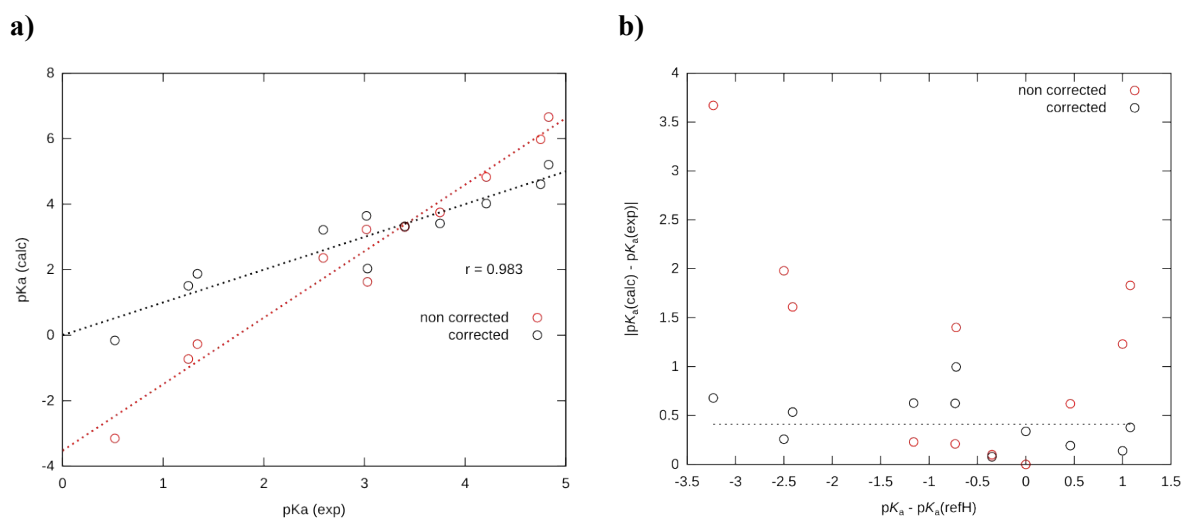

**Figure S3. a)** Plot of the predicted vs experimental  $pK_a$  values for a set of carboxylic acids before (red) and after correction (black) (carboxylic acids considered: trifluoroacetic, oxalic, difluoroacetic, fluoroacetic, fumaric, tartaric, D-malic, formic, succinic, butanoic and acetic acids. Experimental  $pK_a$  values taken from the *Handbook of chemistry and physics 95<sup>th</sup> edition*). Before correction, the regression parameters are  $a=2.030$  (slope) and  $b=-3.526$  (offset). Corrected values are obtained with the addition of the term  $corr(x) = (1 - a)x - b$  to each computed value. **b)** Plot of absolute errors of the predicted  $pK_a$  values against the  $pK_a$  difference with respect to the reference before correction (red) and after correction (black). Mean absolute error of the corrected values is displayed with a dashed line ( $\sim 0.4$   $pK_a$  unit).

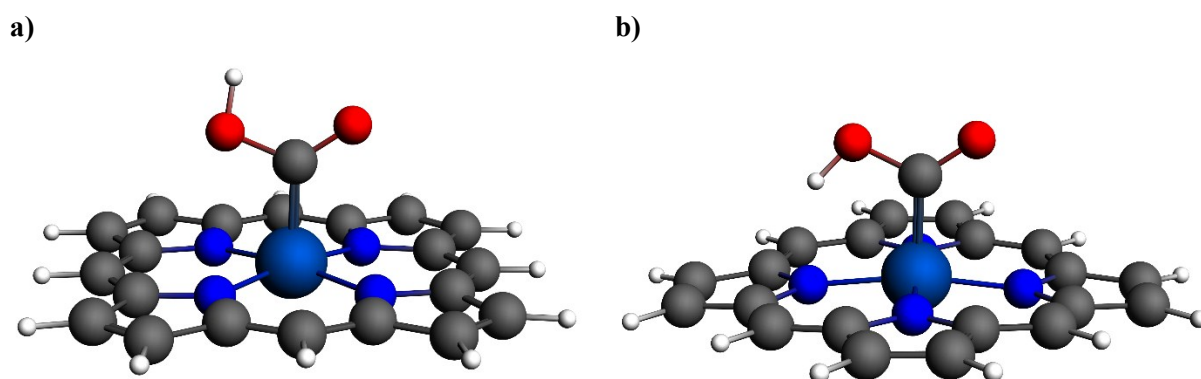

**Figure S4.** Structures of the two isomers of the neutral  $[CoP-COOH]$  intermediate **a)** without and **b)** with intramolecular hydrogen bond. Structures are very similar for the anionic  $[CoP-COOH]$  intermediate without explicit solvation.

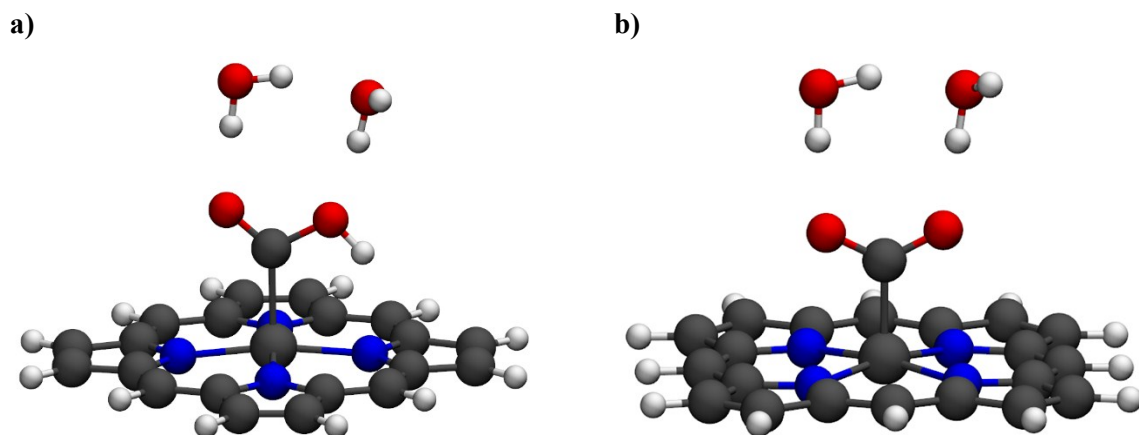

**Figure S5.** Structures of the anionic species a)  $[\text{CoP-COOH}]^-$  and b)  $[\text{CoP-CO}_2]^-$  with two explicit water molecules.

|                      | $[\text{CoP-COOH}]^-$ | $[\text{CoP-CO}_2]^{2-}$ | $[\text{CoP-COOH}]^-$<br>+ 2 $\text{H}_2\text{O}$ | $[\text{CoP-CO}_2]^{2-}$<br>+ 2 $\text{H}_2\text{O}$ |
|----------------------|-----------------------|--------------------------|---------------------------------------------------|------------------------------------------------------|
| Co                   | 0.39                  | 0.34                     | 0.39                                              | 0.35                                                 |
| P                    | -1.34                 | -1.55                    | -0.80                                             | -1.51                                                |
| COOH / $\text{CO}_2$ | -0.05                 | -0.79                    | -0.52                                             | -0.76                                                |

**Table S1.** Natural charges borne by the fragments, Cobalt (Co), Porphyrin (P), carboxyl (COOH) and  $\text{CO}_2$  ( $\text{CO}_2$ ) in  $[\text{CoP-COOH}]^-$  and  $[\text{CoP-CO}_2]^{2-}$  with and without explicit microsolvation.
